# Supplementary material
Source: PubMed Central journal article supplement (PMC8370242)
Supplement: aac.01043-21-s0001.pdf [file aac.01043-21-s0001.pdf]

**Supplementary Table 1.** Metabolic pathways of CYP substrate drugs and comparison of predicted and observed drug-drug interaction caused by rifampicin and rifabutin.

#### Abbreviations

a.m., active moiety; BCRP, breast cancer resistance protein; CR, contribution ratio of cytochrome P450 (see main text); NAT, N-acetyltransferase; OATP, Organic-anion-transporting-polypeptides; PE, prediction error of  $R_{AUC}$  (predicted  $R_{AUC}$  - observed  $R_{AUC}$ ); PGP, P-glycoprotein;  $R_{AUC}$ , ratio of areas under the concentration-time curve (see main text),  $R_{AUC}$  OBS, observed  $R_{AUC}$ ;  $R_{AUC}$  PRED, predicted  $R_{AUC}$ ; UGT, UDP-glucuronosyltransferase.

CR values were taken from the DDI-predictor website: [www.ddi-predictor.org](http://www.ddi-predictor.org)

Non-CYP pathways were retrieved from drugbank (<https://go.drugbank.com>) and transformer application databases (<https://bioinformatics.charite.de/transformer>)

Target interval of predicted  $R_{AUC}$  is 0.5 to 2 times the observed  $R_{AUC}$ .



|                    |      |      |      |      |      |   |   |     |      |       |       |      |       |       |        |
|--------------------|------|------|------|------|------|---|---|-----|------|-------|-------|------|-------|-------|--------|
| Dienogest          | 0.6  | 0    | 0    | 0    | 0    |   |   |     |      | 0.17  | 0.18  | 0.06 | 44    |       |        |
| Disopyramide       | 0.22 | 0    | 0    | 0    | 0    |   |   |     |      | 0.33  | 0.37  | 0.12 | 45    |       |        |
| doravirine         | 0.78 | 0    | 0    | 0    | 0    |   |   | 0.5 | 0.37 | -0.26 | 0.12  | 0.14 | 0.17  | 46    |        |
| Erlotinib          | 0.47 | 0    | 0    | 0    | 0.35 |   |   |     |      |       | 0.25  | 0.2  | -0.20 | 47    |        |
| esaxerenone        | 0.33 | 0    | 0    | 0    | 0    |   |   |     |      |       | 0.31  | 0.28 | -0.10 | 48    |        |
| Estradiol valerate | 0.26 | 0    | 0    | 0    | 0    |   |   |     |      |       | 0.56  | 0.33 | -0.41 | 49    |        |
| Ethinylestradiol   | 0.26 | 0    | 0    | 0    | 0    |   | X |     | 0.65 | 0.64  | -0.02 | 0.34 | 0.33  | -0.03 | 44     |
| Etravirine         | 0.44 | 0    | 0    | 0    | 0    |   |   |     | 0.63 | 0.37  | -0.41 |      |       |       | 50     |
| Fesoterodine a.m.  | 0.53 | 0.47 | 0    | 0    | 0    |   |   |     |      |       | 0.23  | 0.2  | -0.13 | 51    |        |
| Flibanserin        | 0.82 | 0    | 0    | 0.18 | 0    |   |   |     |      |       | 0.05  | 0.12 | 1.40  | 52    |        |
| Fluvastatin        | 0    | 0    | 0.8  | 0    | 0    | X |   |     |      |       | 0.5   | 0.51 | 0.02  | 53    |        |
| Fostamatinib a.m.  | 0.44 | 0    | 0    | 0    | 0    |   |   |     |      |       | 0.25  | 0.23 | -0.08 | 54    |        |
| Gefitinib          | 0.39 | 0.5  | 0    | 0    | 0    |   |   |     |      |       | 0.17  | 0.25 | 0.47  | 55    |        |
| Gemigliptin        | 0.56 | 0    | 0    | 0    | 0    |   |   |     |      |       | 0.2   | 0.19 | -0.05 | 56    |        |
| Gliben-Glyburide   | 0    | 0    | 0.63 | 0    | 0    |   |   |     |      |       | 0.61  | 0.57 | -0.07 | 57    |        |
| Glimepiride        | 0    | 0    | 0.99 | 0    | 0    |   | X |     |      |       | 0.34  | 0.45 | 0.32  | 58    |        |
| Ibrutinib (fasten) | 0.98 | 0    | 0    | 0    | 0    |   |   |     |      |       | 0.11  | 0.12 | 0.09  | 59    |        |
| Imatinib           | 0.35 | 0    | 0    | 0    | 0    | X |   |     |      |       | 0.26  | 0.27 | 0.04  | 60    |        |
| Isavuconazole      | 0.86 | 0    | 0    | 0    | 0    |   |   |     |      |       | 0.1   | 0.13 | 0.30  | 61    |        |
| Ivacaftor          | 0.9  | 0    | 0    | 0    | 0    |   |   |     |      |       | 0.11  | 0.13 | 0.18  | 62    |        |
| laquinimod         | 0.66 | 0    | 0    | 0    | 0    |   |   |     |      |       | 0.2   | 0.16 | -0.20 | 63    |        |
| lorlatinib         | 0.31 | 0    | 0    | 0    | 0    |   |   |     |      |       | 0.15  | 0.3  | 1.00  | 64    |        |
| Losartan           | 0    | 0    | 0.4  | 0    | 0    |   | X | X   |      |       | 0.69  | 0.67 | -0.03 | 65    |        |
| Lurasidone         | 0.72 | 0    | 0    | 0    | 0    |   |   |     |      |       | 0.19  | 0.15 | -0.21 | 66    |        |
| Mefloquine         | 0.44 | 0    | 0    | 0    | 0    |   |   |     |      |       | 0.32  | 0.23 | -0.28 | 67    |        |
| Midazolam          | 0.91 | 0    | 0    | 0    | 0    |   | X |     | 0.31 | 0.34  | 0.10  | 0.12 | 0.12  | 0.00  | 68,106 |
| Midazolam          | 0.91 | 0    | 0    | 0    | 0    |   | X |     |      |       | 0.04  | 0.12 | 2.00  | 69    |        |
| naldemedine        | 0.62 | 0    | 0    | 0    | 0    |   |   |     |      |       | 0.17  | 0.17 | 0.00  | 70    |        |
| Naloxegol          | 0.95 | 0    | 0    | 0    | 0    |   |   |     |      |       | 0.11  | 0.12 | 0.09  | 71    |        |

|               |      |      |      |      |      |   |  |   |   |   |      |      |       |       |      |       |        |
|---------------|------|------|------|------|------|---|--|---|---|---|------|------|-------|-------|------|-------|--------|
| Nateglinide   | 0    | 0    | 0.48 | 0    | 0    |   |  |   |   |   |      | 0.76 | 0.63  | -0.17 | 72   |       |        |
| neratinib     | 0.89 | 0    | 0    | 0    | 0    |   |  | X |   |   |      | 0.12 | 0.13  | 0.08  | 73   |       |        |
| Netupitant    | 0.51 | 0    | 0    | 0    | 0    |   |  |   | X |   |      | 0.19 | 0.2   | 0.05  | 74   |       |        |
| Nifedipine    | 0.72 | 0    | 0    | 0    | 0    |   |  |   |   |   |      | 0.08 | 0.15  | 0.88  | 75   |       |        |
| Nilotinib     | 0.67 | 0    | 0    | 0    | 0    |   |  | X |   |   |      | 0.2  | 0.16  | -0.20 | 76   |       |        |
| Olaparib      | 0.67 | 0    | 0    | 0    | 0    |   |  |   | X |   |      | 0.13 | 0.16  | 0.23  | 77   |       |        |
| Palbociclib   | 0.49 | 0    | 0    | 0    | 0    |   |  |   | X |   |      | 0.15 | 0.21  | 0.40  | 78   |       |        |
| Palonosetron  | 0.05 | 0.2  | 0    | 0    | 0    |   |  |   |   |   |      | 0.81 | 0.72  | -0.11 | 74   |       |        |
| Phenytoin     | 0    | 0    | 0.72 | 0.19 | 0    | X |  | X | X |   |      | 0.5  | 0.37  | -0.26 | 79   |       |        |
| Pitolisant    | 0.13 | 0.52 | 0    | 0    | 0    |   |  |   |   |   |      | 0.5  | 0.5   | 0.00  | 80   |       |        |
| Ponatinib     | 0.32 | 0    | 0    | 0    | 0    |   |  |   | X |   |      | 0.37 | 0.29  | -0.22 | 81   |       |        |
| Praziquantel  | 0.49 | 0    | 0    | 0.18 | 0    |   |  |   |   |   |      | 0.15 | 0.18  | 0.20  | 82   |       |        |
| Prednisolone  | 0.18 | 0    | 0    | 0    | 0    |   |  |   | X |   |      | 0.49 | 0.42  | -0.14 | 83   |       |        |
| Prednisolone  | 0.18 | 0    | 0    | 0    | 0    |   |  |   | X |   |      | 0.72 | 0.42  | -0.42 | 84   |       |        |
| Propranolol   | 0    | 0.51 | 0    | 0.26 | 0.23 |   |  | X |   |   |      | 0.37 | 0.41  | 0.11  | 85   |       |        |
| Ramelteon     | 0    | 0    | 0    | 0.42 | 0.58 |   |  |   |   |   |      | 0.2  | 0.28  | 0.40  | 86   |       |        |
| Regorafenib   | 0.18 | 0    | 0    | 0    | 0    |   |  |   | X |   |      | 0.5  | 0.42  | -0.16 | 87   |       |        |
| Ribociclib    | 0.93 | 0    | 0    | 0    | 0    |   |  |   |   |   |      | 0.11 | 0.12  | 0.09  | 88   |       |        |
| Ruxolitinib   | 0.35 | 0    | 0    | 0    | 0    |   |  |   |   |   |      | 0.3  | 0.27  | -0.10 | 89   |       |        |
| Saquinavir    | 0.58 | 0    | 0    | 0    | 0    | X |  | X | X | X | 0.53 | 0.45 | -0.15 |       | 90   |       |        |
| Simvastatin   | 0.97 | 0    | 0    | 0    | 0    | X |  |   | X |   |      | 0.09 | 0.12  | 0.33  | 68   |       |        |
| Simvastatin   | 0.97 | 0    | 0    | 0    | 0    | X |  |   | X |   |      | 0.14 | 0.12  | -0.14 | 91   |       |        |
| Siponimod     | 0.12 | 0    | 0.77 | 0    | 0    |   |  |   |   |   |      | 0.43 | 0.35  | -0.19 | 92   |       |        |
| Sunitinib     | 0.42 | 0    | 0    | 0    | 0    |   |  |   |   |   |      | 0.25 | 0.24  | -0.04 | 93   |       |        |
| suvorexant    | 0.75 | 0    | 0    | 0    | 0    |   |  |   | X |   |      | 0.12 | 0.15  | 0.25  | 94   |       |        |
| Tasimelteon   | 0.15 | 0    | 0    | 0    | 0.85 |   |  |   |   |   |      | 0.11 | 0.3   | 1.73  | 95   |       |        |
| Telithromycin | 0.49 | 0    | 0    | 0    | 0    | X |  |   |   |   |      | 0.14 | 0.21  | 0.50  | 96   |       |        |
| Tizanidine    | 0    | 0    | 0    | 0    | 0.97 |   |  |   |   |   |      | 0.46 | 0.42  | -0.09 | 97   |       |        |
| Tolbutamide   | 0    | 0    | 0.89 | 0    | 0    |   |  | X |   |   | 0.63 | 0.63 | 0     | 0.36  | 0.48 | -0.33 | 106,13 |

|                                                   |      |     |   |      |      |  |   |      |      |                |      |                |     |
|---------------------------------------------------|------|-----|---|------|------|--|---|------|------|----------------|------|----------------|-----|
| Tolvaptan                                         | 0.81 | 0   | 0 | 0    | 0    |  |   |      |      | 0.13           | 0.14 | 0.08           | 98  |
| Triazolam                                         | 0.93 | 0   | 0 | 0    | 0    |  |   |      |      | 0.05           | 0.12 | 1.40           | 99  |
| Ulipristal                                        | 0.86 | 0   | 0 | 0    | 0    |  |   |      |      | 0.1            | 0.13 | 0.30           | 100 |
| Vandetanib                                        | 0.09 | 0   | 0 | 0    | 0    |  | X |      |      | 0.6            | 0.59 | -0.02          | 101 |
| Voriconazole                                      | 0.31 | 0   | 0 | 0.68 | 0    |  |   | 0.22 | 0.22 | 0              |      |                | 40  |
| Vortioxetine                                      | 0.24 | 0.6 | 0 | 0.13 | 0    |  |   |      |      |                |      |                | 102 |
| zanubrutinib                                      | 0.8  | 0   | 0 | 0    | 0    |  |   |      |      |                |      |                | 105 |
| Zolpidem                                          | 0.4  | 0   | 0 | 0    | 0.35 |  |   |      |      |                |      |                | 103 |
| Zopiclone                                         | 0.44 | 0   | 0 | 0    | 0    |  |   |      |      |                |      |                | 104 |
| Mean PE (SD)                                      |      |     |   |      |      |  |   |      |      | 0.11<br>(0.22) |      | 0.13<br>(0.50) |     |
| Percentage of R <sub>AUC</sub> in target interval |      |     |   |      |      |  |   |      |      | 0.91           |      | 0.94           |     |
